# Supplementary material for: Abnormal pH elevation in the Chaobai River, a reclaimed water intake area
Source: Royal Society of Chemistry journal article supplement (doi:10.1039/c6em00535g), 2016-11-29
Supplement: c6em00535g1.pdf [file c6em00535g1.pdf]

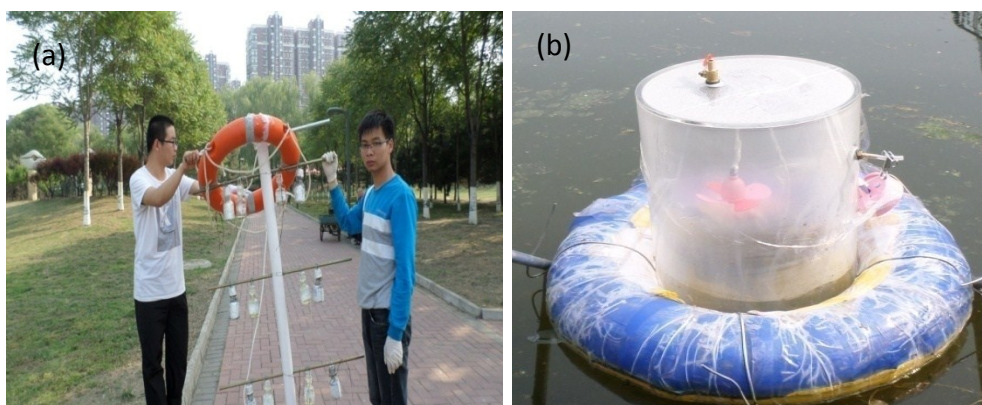

Fig. S1 The sampling device figure of photosynthesis (a) and water-air CO<sub>2</sub> exchange (b)

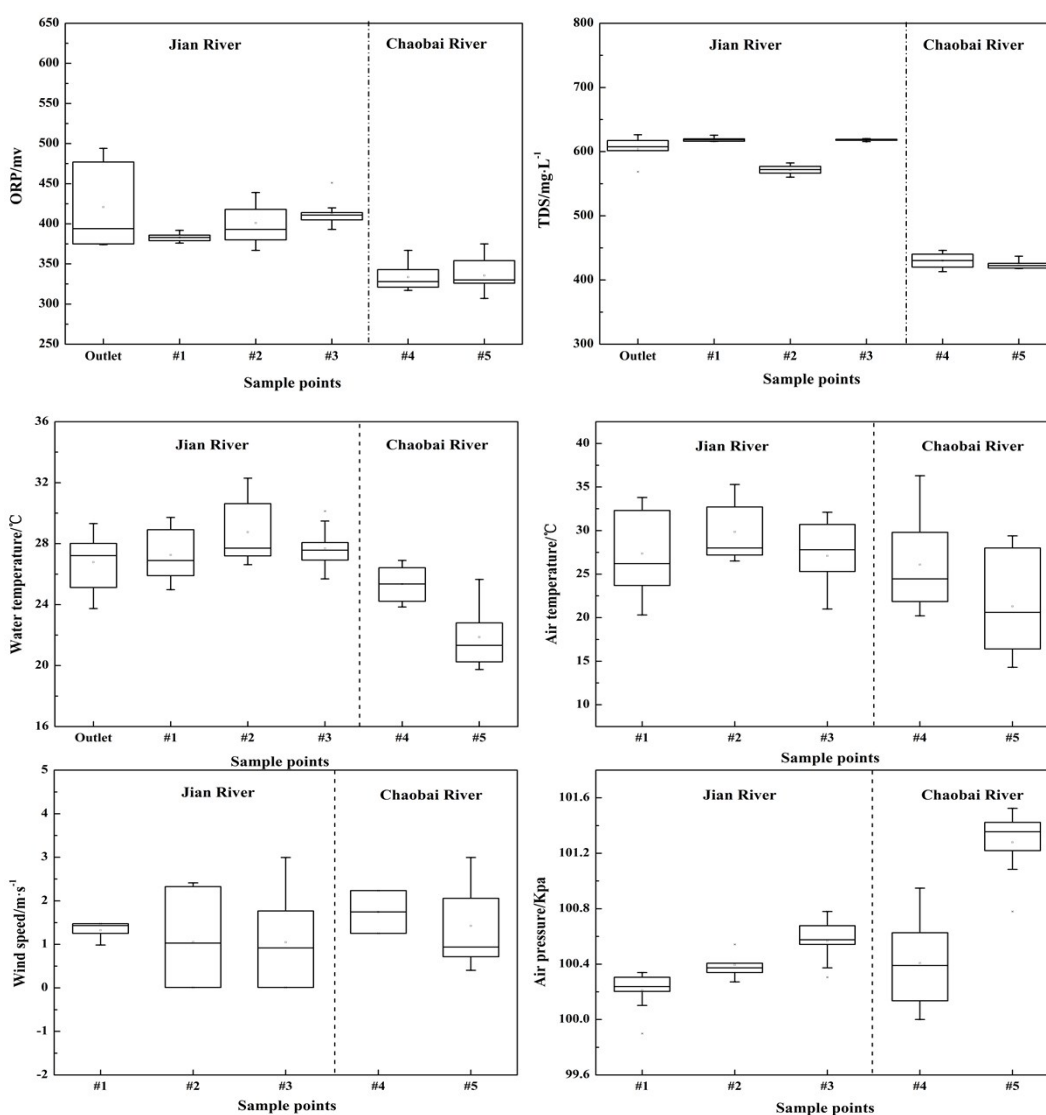

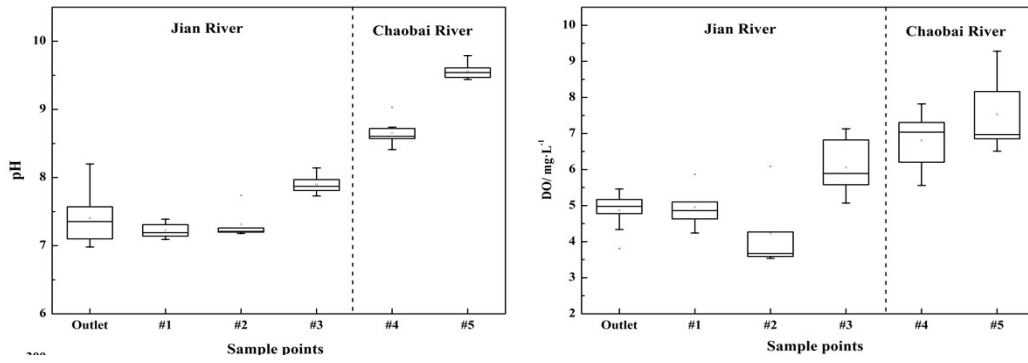

Fig. S2 The conventional water quality indicators and meteorological indicators monitored in the field

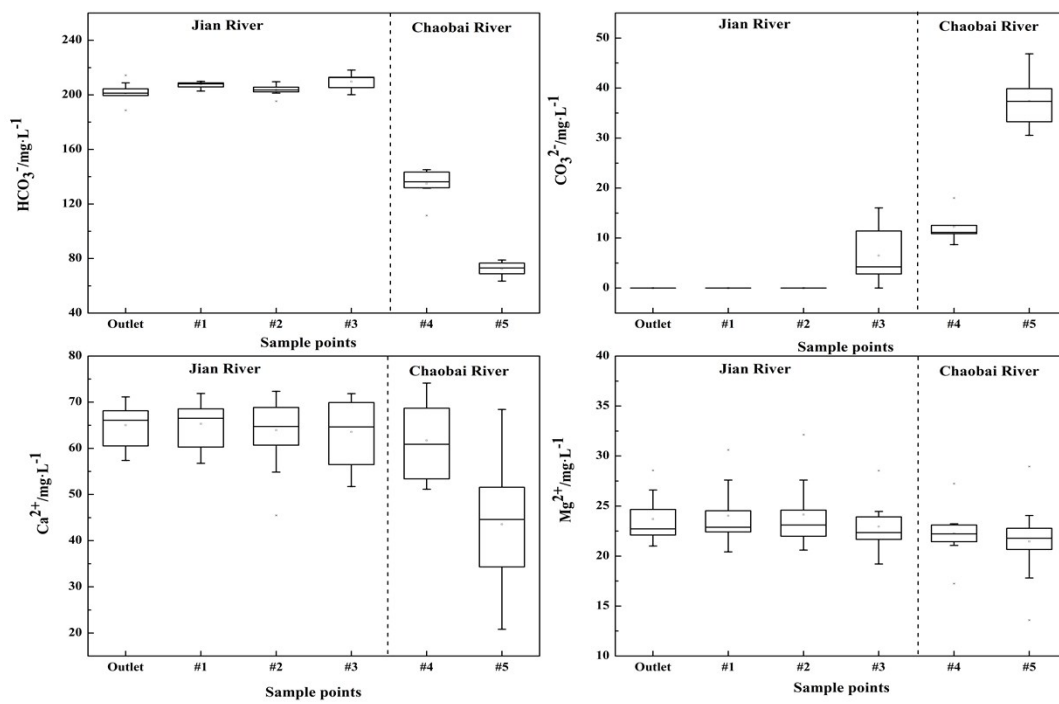

Fig. S3 The inorganic ions indicators in the monitor sections

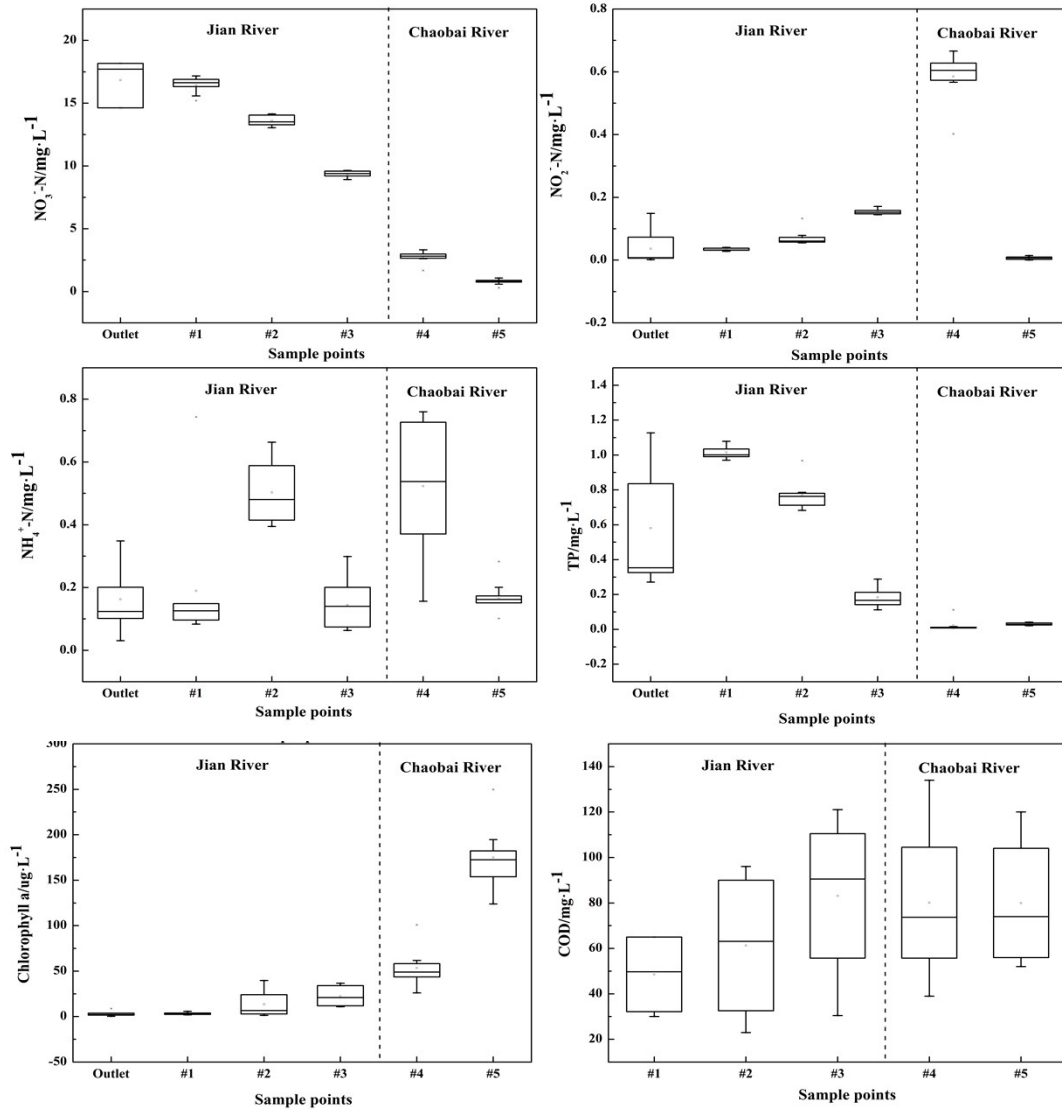

Fig. S4 The nutrition indicators and algae indicators in the monitor sections
